# Supplementary material for: The Effect of Outdoor Aeroallergens on Asthma Hospitalizations in Children in North-Western Tuscany, Italy
Source: MDPI journal article supplement (doi:10.3390/ijerph19063586), 2022-03-17
Supplement: s1 [file s1]

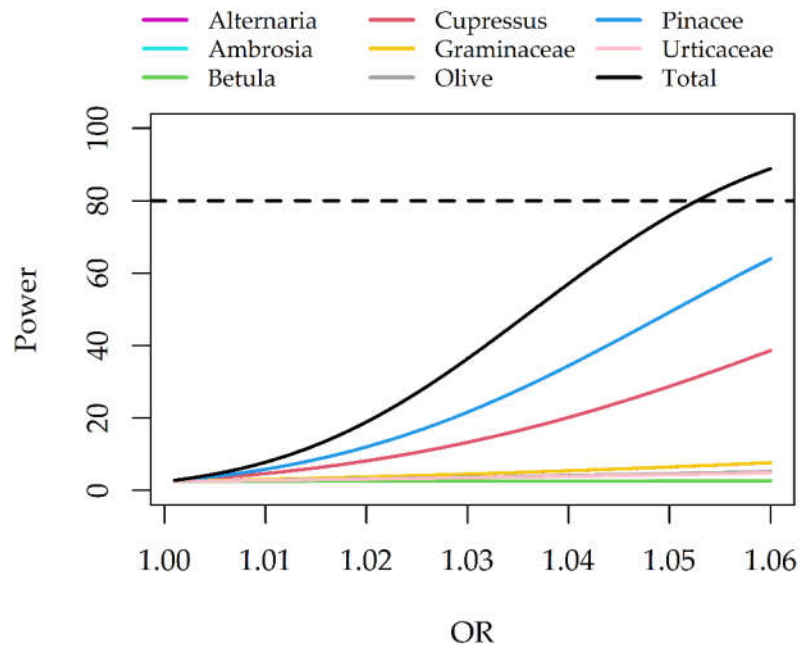

**Figure S1.** Power analysis for each aeroallergen based on a range of expected ORs from 1.01 to 1.06. Only total aeroallergens reached a power of 80% in the OR range.

**Table S1.** Acute effects of outdoor aeroallergen counts on the risk of asthma admissions: odds ratios (10-grains/m<sup>3</sup> increase) and 95% confidence intervals through the conditional logistic regression models: overall effects (n=85) of each aeroallergen. Significant effects are in bold.

| Lag   | Alternaria                              | Ambrosia                 | Betula                   | Cupressus               | Graminaceae             | Olive                   | Pinaceae                | Urticaceae              |
|-------|-----------------------------------------|--------------------------|--------------------------|-------------------------|-------------------------|-------------------------|-------------------------|-------------------------|
| Lag 0 | <b>1.140</b><br>[ <b>1.020, 1.275</b> ] | 4.922<br>[0.2, 121.308]  | 1.473<br>[0.293, 7.394]  | 1.034<br>[0.981, 1.090] | 0.939<br>[0.791, 1.115] | 1.751<br>[0.963, 3.183] | 1.056<br>[0.984, 1.134] | 1.192<br>[0.959, 1.483] |
| Lag 1 | <b>1.101</b><br>[ <b>1.013, 1.197</b> ] | 1.228<br>[0.120, 12.606] | 1.487<br>[0.492, 4.493]  | 1.015<br>[0.980, 1.052] | 0.957<br>[0.855, 1.072] | 1.442<br>[0.979, 2.123] | 1.041<br>[0.991, 1.094] | 1.122<br>[0.965, 1.305] |
| Lag 2 | <b>1.063</b><br>[ <b>1.002, 1.128</b> ] | 0.306<br>[0.017, 5.640]  | 1.501<br>[0.503, 4.481]  | 0.996<br>[0.961, 1.033] | 0.976<br>[0.906, 1.052] | 1.187<br>[0.985, 1.431] | 1.026<br>[0.996, 1.058] | 1.056<br>[0.957, 1.166] |
| Lag 3 | 1.027<br>[0.979, 1.076]                 | 0.076<br>[0.001, 6.291]  | 1.515<br>[0.309, 7.416]  | 0.978<br>[0.927, 1.032] | 0.995<br>[0.911, 1.086] | 0.977<br>[0.873, 1.095] | 1.012<br>[0.991, 1.033] | 0.994<br>[0.909, 1.087] |
| Lag 4 | 0.991<br>[0.938, 1.047]                 | 0.019<br>[0.001, 9.310]  | 1.529<br>[0.156, 14.964] | 0.960<br>[0.889, 1.037] | 1.014<br>[0.883, 1.165] | 0.805<br>[0.603, 1.074] | 0.997<br>[0.966, 1.029] | 0.936<br>[0.819, 1.07]  |
| Lag 5 | 0.957<br>[0.886, 1.034]                 | 0.005<br>[0.001, 15.192] | 1.544<br>[0.074, 32.238] | 0.942<br>[0.851, 1.044] | 1.033<br>[0.846, 1.262] | 0.663<br>[0.403, 1.088] | 0.983<br>[0.934, 1.035] | 0.881<br>[0.722, 1.074] |

**Table S2.** Acute effects of outdoor aeroallergen counts on the risk of asthma admissions overall and by child subgroup: odds ratios (10-grains/m<sup>3</sup> increase) and 95% confidence intervals through the conditional logistic regression models excluding children below 2 years. Significant effects are in bold.

| Lag   | Overall<br>(n=75)                       | Outdoor<br>sensitization<br>(n=35)      | No outdoor<br>sensitization<br>(n=38) | Females<br>(n=31)       | Males<br>(n=44)                         | 0-4 years<br>(n=30)     | 5-17 years<br>(n=45)                    |
|-------|-----------------------------------------|-----------------------------------------|---------------------------------------|-------------------------|-----------------------------------------|-------------------------|-----------------------------------------|
| Lag 0 | <b>1.054</b><br>[ <b>1.010, 1.099</b> ] | <b>1.085</b><br>[ <b>1.004, 1.173</b> ] | 1.034<br>[0.983, 1.087]               | 1.030<br>[0.981, 1.082] | <b>1.076</b><br>[ <b>1.011, 1.146</b> ] | 1.031<br>[0.956, 1.112] | <b>1.065</b><br>[ <b>1.007, 1.127</b> ] |
| Lag 1 | <b>1.036</b><br>[ <b>1.007, 1.067</b> ] | <b>1.058</b><br>[ <b>1.003, 1.115</b> ] | 1.021<br>[0.986, 1.058]               | 1.023<br>[0.989, 1.059] | <b>1.050</b><br>[ <b>1.007, 1.095</b> ] | 1.014<br>[0.962, 1.068] | <b>1.046</b><br>[ <b>1.007, 1.087</b> ] |
| Lag 2 | <b>1.019</b><br>[ <b>1.001, 1.037</b> ] | <b>1.031</b><br>[ <b>1.001, 1.061</b> ] | 1.009<br>[0.985, 1.033]               | 1.017<br>[0.991, 1.042] | <b>1.025</b><br>[ <b>1.001, 1.050</b> ] | 0.997<br>[0.962, 1.032] | <b>1.027</b><br>[ <b>1.004, 1.052</b> ] |
| Lag 3 | 1.002<br>[0.988, 1.017]                 | 1.004<br>[0.986, 1.023]                 | 0.997<br>[0.973, 1.021]               | 1.010<br>[0.981, 1.039] | 1.000<br>[0.983, 1.017]                 | 0.980<br>[0.946, 1.015] | 1.009<br>[0.991, 1.026]                 |
| Lag 4 | 0.986<br>[0.963, 1.009]                 | 0.979<br>[0.945, 1.013]                 | 0.984<br>[0.950, 1.020]               | 1.003<br>[0.962, 1.046] | 0.975<br>[0.946, 1.005]                 | 0.963<br>[0.913, 1.015] | 0.991<br>[0.964, 1.018]                 |
| Lag 5 | 0.969<br>[0.935, 1.005]                 | 0.954<br>[0.899, 1.012]                 | 0.972<br>[0.924, 1.023]               | 0.997<br>[0.940, 1.056] | 0.952<br>[0.906, 1.000]                 | 0.947<br>[0.877, 1.022] | 0.973<br>[0.931, 1.016]                 |

**Table S3.** Acute effects of outdoor aeroallergen counts on the risk of asthma admissions overall and by child subgroup: odds ratios (10-grains/m<sup>3</sup> increase) and 95% confidence intervals through the conditional logistic regression models excluding cases that occurred before the end of March. Significant effects are in bold.

| Lag   | Overall<br>(n=68)                       | Outdoor<br>sensitization<br>(n=29)      | No outdoor<br>sensitization<br>(n=36) | Females<br>(n=26)       | Males<br>(n=42)                         | 0-4 years<br>(n=33)     | 5-17 years<br>(n=35)                    |
|-------|-----------------------------------------|-----------------------------------------|---------------------------------------|-------------------------|-----------------------------------------|-------------------------|-----------------------------------------|
| Lag 0 | <b>1.064</b><br>[ <b>1.012, 1.119</b> ] | <b>1.098</b><br>[ <b>1.003, 1.201</b> ] | 1.047<br>[0.986, 1.112]               | 1.050<br>[0.948, 1.164] | <b>1.069</b><br>[ <b>1.007, 1.134</b> ] | 1.032<br>[0.958, 1.112] | <b>1.087</b><br>[ <b>1.009, 1.171</b> ] |
| Lag 1 | <b>1.044</b><br>[ <b>1.009, 1.081</b> ] | <b>1.067</b><br>[ <b>1.004, 1.133</b> ] | 1.032<br>[0.990, 1.075]               | 1.037<br>[0.967, 1.113] | <b>1.047</b><br>[ <b>1.005, 1.090</b> ] | 1.021<br>[0.970, 1.075] | <b>1.061</b><br>[ <b>1.008, 1.116</b> ] |
| Lag 2 | <b>1.025</b><br>[ <b>1.004, 1.046</b> ] | <b>1.037</b><br>[ <b>1.003, 1.072</b> ] | 1.016<br>[0.989, 1.044]               | 1.025<br>[0.982, 1.069] | <b>1.025</b><br>[ <b>1.002, 1.050</b> ] | 1.010<br>[0.978, 1.043] | <b>1.035</b><br>[ <b>1.005, 1.066</b> ] |
| Lag 3 | 1.006<br>[0.992, 1.021]                 | 1.008<br>[0.988, 1.027]                 | 1.001<br>[0.978, 1.025]               | 1.012<br>[0.980, 1.046] | 1.005<br>[0.988, 1.021]                 | 0.999<br>[0.972, 1.026] | 1.010<br>[0.991, 1.028]                 |
| Lag 4 | 0.988<br>[0.964, 1.012]                 | 0.979<br>[0.943, 1.017]                 | 0.986<br>[0.953, 1.021]               | 1.004<br>[0.964, 1.046] | 0.984<br>[0.957, 1.012]                 | 0.988<br>[0.947, 1.030] | 0.985<br>[0.954, 1.017]                 |
| Lag 5 | 0.969<br>[0.932, 1.008]                 | 0.952<br>[0.891, 1.016]                 | 0.972<br>[0.923, 1.023]               | 0.988<br>[0.910, 1.072] | 0.964<br>[0.921, 1.009]                 | 0.977<br>[0.917, 1.042] | 0.961<br>[0.910, 1.015]                 |

**Table S4.** Acute effects of outdoor aeroallergen counts on the risk of asthma admissions overall and by child subgroup: odds ratios (10-grains/m<sup>3</sup> increase) and 95% confidence intervals through the conditional logistic regression models: time-stratified design. Significant effects are in bold.

| Lag   | Overall<br>(n=85)                       | Outdoor<br>sensitization<br>(n=35)      | No outdoor<br>sensitization<br>(n=47) | Females<br>(n=36)       | Males<br>(n=49)                         | 0-4 years<br>(n=40)     | 5-17 years<br>(n=45)                    |
|-------|-----------------------------------------|-----------------------------------------|---------------------------------------|-------------------------|-----------------------------------------|-------------------------|-----------------------------------------|
| Lag 0 | <b>1.046</b><br>[ <b>1.013, 1.081</b> ] | <b>1.101</b><br>[ <b>1.020, 1.188</b> ] | 1.024<br>[0.984, 1.066]               | 1.027<br>[0.990, 1.065] | <b>1.064</b><br>[ <b>1.016, 1.115</b> ] | 1.012<br>[0.958, 1.069] | <b>1.069</b><br>[ <b>1.015, 1.124</b> ] |
| Lag 1 | <b>1.031</b><br>[ <b>1.009, 1.055</b> ] | <b>1.066</b><br>[ <b>1.013, 1.122</b> ] | 1.016<br>[0.988, 1.045]               | 1.020<br>[0.996, 1.045] | <b>1.043</b><br>[ <b>1.010, 1.076</b> ] | 1.006<br>[0.968, 1.045] | <b>1.047</b><br>[ <b>1.012, 1.084</b> ] |
| Lag 2 | <b>1.016</b><br>[ <b>1.003, 1.031</b> ] | <b>1.033</b><br>[ <b>1.005, 1.061</b> ] | 1.008<br>[0.989, 1.027]               | 1.013<br>[0.996, 1.029] | <b>1.022</b><br>[ <b>1.002, 1.041</b> ] | 1.000<br>[0.976, 1.024] | <b>1.026</b><br>[ <b>1.006, 1.047</b> ] |
| Lag 3 | 1.002<br>[0.990, 1.014]                 | 1.001<br>[0.984, 1.018]                 | 0.999<br>[0.982, 1.017]               | 1.005<br>[0.986, 1.026] | 1.001<br>[0.986, 1.016]                 | 0.994<br>[0.973, 1.015] | 1.006<br>[0.990, 1.021]                 |
| Lag 4 | 0.987<br>[0.969, 1.007]                 | 0.969<br>[0.936, 1.003]                 | 0.991<br>[0.966, 1.017]               | 0.998<br>[0.968, 1.030] | 0.981<br>[0.956, 1.006]                 | 0.988<br>[0.957, 1.020] | 0.986<br>[0.960, 1.012]                 |
| Lag 5 | 0.973<br>[0.945, 1.002]                 | 0.939<br>[0.928, 1.001]                 | 0.983<br>[0.948, 1.020]               | 0.991<br>[0.948, 1.037] | 0.961<br>[0.924, 1.001]                 | 0.982<br>[0.936, 1.030] | 0.966<br>[0.926, 1.007]                 |

**Table S5.** Acute effects of outdoor aeroallergen counts on the risk of asthma admissions overall and by child subgroup: odds ratios (10-grains/m<sup>3</sup> increase) and 95% confidence intervals through the conditional logistic regression models adjusted by apparent temperature. Significant effects are in bold.

| Lag   | Overall<br>(n=85)              | Outdoor<br>sensitization<br>(n=35) | No outdoor<br>sensitization<br>(n=47) | Females<br>(n=36)       | Males<br>(n=49)                | 0-4 years<br>(n=40)     | 5-17 years<br>(n=45)           |
|-------|--------------------------------|------------------------------------|---------------------------------------|-------------------------|--------------------------------|-------------------------|--------------------------------|
| Lag 0 | <b>1.055</b><br>[1.011, 1.102] | <b>1.090</b><br>[1.004, 1.182]     | 1.035<br>[0.984, 1.089]               | 1.038<br>[0.976, 1.103] | <b>1.064</b><br>[1.004, 1.128] | 1.031<br>[0.959, 1.110] | <b>1.074</b><br>[1.010, 1.142] |
| Lag 1 | <b>1.039</b><br>[1.008, 1.070] | <b>1.061</b><br>[1.004, 1.121]     | 1.025<br>[0.988, 1.062]               | 1.030<br>[0.986, 1.075] | <b>1.044</b><br>[1.003, 1.086] | 1.019<br>[0.969, 1.072] | <b>1.052</b><br>[1.008, 1.098] |
| Lag 2 | <b>1.022</b><br>[1.004, 1.041] | <b>1.033</b><br>[1.002, 1.065]     | 1.014<br>[0.989, 1.040]               | 1.021<br>[0.991, 1.052] | <b>1.024</b><br>[1.000, 1.048] | 1.008<br>[0.976, 1.040] | <b>1.031</b><br>[1.004, 1.058] |
| Lag 3 | 1.006<br>[0.992, 1.021]        | 1.006<br>[0.987, 1.025]            | 1.004<br>[0.982, 1.026]               | 1.013<br>[0.984, 1.043] | 1.005<br>[0.988, 1.022]        | 0.996<br>[0.969, 1.024] | 1.010<br>[0.992, 1.028]        |
| Lag 4 | 0.990<br>[0.969, 1.013]        | 0.979<br>[0.945, 1.015]            | 0.994<br>[0.964, 1.024]               | 1.005<br>[0.965, 1.047] | 0.985<br>[0.958, 1.013]        | 0.984<br>[0.944, 1.027] | 0.990<br>[0.962, 1.018]        |
| Lag 5 | 0.975<br>[0.942, 1.009]        | 0.954<br>[0.898, 1.013]            | 0.984<br>[0.941, 1.028]               | 0.997<br>[0.940, 1.058] | 0.967<br>[0.924, 1.011]        | 0.973<br>[0.913, 1.037] | 0.970<br>[0.927, 1.015]        |

**Table S6.** Acute effects of outdoor aeroallergen counts on the risk of asthma admissions overall and by child subgroup: odds ratios (10-grains/m<sup>3</sup> increase) and 95% confidence intervals through the conditional logistic regression models adjusted by nitrogen dioxide (NO<sub>2</sub>). Significant effects are in bold.

| Lag   | Overall<br>(n=85)              | Outdoor<br>sensitization<br>(n=35) | No outdoor<br>sensitization<br>(n=47) | Females<br>(n=36)       | Males<br>(n=49)                | 0-4 years<br>(n=40)     | 5-17 years<br>(n=45)           |
|-------|--------------------------------|------------------------------------|---------------------------------------|-------------------------|--------------------------------|-------------------------|--------------------------------|
| Lag 0 | <b>1.054</b><br>[1.011, 1.099] | <b>1.093</b><br>[1.008, 1.185]     | 1.037<br>[0.986, 1.091]               | 1.034<br>[0.980, 1.091] | <b>1.073</b><br>[1.011, 1.139] | 1.031<br>[0.961, 1.106] | <b>1.067</b><br>[1.008, 1.128] |
| Lag 1 | <b>1.037</b><br>[1.008, 1.068] | <b>1.063</b><br>[1.006, 1.122]     | 1.025<br>[0.989, 1.063]               | 1.026<br>[0.989, 1.065] | <b>1.049</b><br>[1.007, 1.092] | 1.019<br>[0.971, 1.069] | <b>1.047</b><br>[1.007, 1.088] |
| Lag 2 | <b>1.021</b><br>[1.003, 1.039] | <b>1.033</b><br>[1.002, 1.065]     | 1.014<br>[0.990, 1.039]               | 1.019<br>[0.992, 1.046] | <b>1.025</b><br>[1.002, 1.050] | 1.007<br>[0.977, 1.038] | <b>1.028</b><br>[1.004, 1.052] |
| Lag 3 | 1.004<br>[0.991, 1.019]        | 1.004<br>[0.986, 1.023]            | 1.002<br>[0.981, 1.024]               | 1.011<br>[0.983, 1.040] | 1.003<br>[0.986, 1.019]        | 0.995<br>[0.969, 1.022] | 1.009<br>[0.991, 1.026]        |
| Lag 4 | 0.988<br>[0.967, 1.010]        | 0.976<br>[0.942, 1.012]            | 0.991<br>[0.962, 1.022]               | 1.004<br>[0.964, 1.046] | 0.980<br>[0.953, 1.008]        | 0.983<br>[0.944, 1.024] | 0.990<br>[0.963, 1.018]        |
| Lag 5 | 0.973<br>[0.940, 1.007]        | 0.949<br>[0.893, 1.009]            | 0.980<br>[0.938, 1.024]               | 0.997<br>[0.940, 1.056] | 0.958<br>[0.915, 1.003]        | 0.972<br>[0.914, 1.033] | 0.972<br>[0.930, 1.016]        |
